# Supplementary material for: Strict Selection Alone of Patients Undergoing Liver Transplantation for Hilar Cholangiocarcinoma Is Associated with Improved Survival
Source: PubMed Central journal article supplement (PMC4898828; doi:10.1371/journal.pone.0156127), 2016-06-08
Supplement: pone.0156127.s001.pdf [file pone.0156127.s001.pdf]

# 1. Hilar CCA Survey

PLEASE FILL IN ONE QUESTIONNAIRE FOR EACH PATIENT THAT UNDERWENT LIVER TRANSPLANTATION FOR HILAR CHOLANGIOCARCINOMA.

## \*1. What is your center's name and what are the patient initials and/or date of birth?

|                                                  |                      |
|--------------------------------------------------|----------------------|
| Name of Medical Center                           | <input type="text"/> |
| City                                             | <input type="text"/> |
| Country                                          | <input type="text"/> |
| Patient initials                                 | <input type="text"/> |
| Male/Female                                      | <input type="text"/> |
| Date of birth (please in the format; DD.MM.YYYY) | <input type="text"/> |

## 2. Date of transplantation?

|      |                      |    |                      |   |                      |
|------|----------------------|----|----------------------|---|----------------------|
|      | DD                   | MM | YYYY                 |   |                      |
| Date | <input type="text"/> | /  | <input type="text"/> | / | <input type="text"/> |

## \*3. What was the indication for liver transplantation?

- Hilar cholangiocarcinoma (CCA)
- Other disease (for example PSC) but hilar cholangiocarcinoma was found incidentally
- Acute liver failure
- If the diagnosis was NOT hilar CCA, you can end the survey for this patient and press "done".

## 4. Was surgical or percutaneous biopsy of the tumor performed BEFORE transplantation?

- Yes
- No
- Unknown

## 5. Was there a previous attempt for surgical resection of the tumor BEFORE transplantation?

- Yes
- No
- Unknown

## 6. Was the patient treated with neo-adjuvant therapy?

- No
- Unknown
- Yes (please specify the type of neo-adjuvant therapy)

**7. Was the patient treated with adjuvant therapy?**

- No
- Unknown
- Yes (please specify the type adjuvant therapy)

**8. What was the definitive histopathological diagnosis? T status:**

- 1
- 2
- 3
- 4

**9. What was the definitive histopathological diagnosis? N status:**

- 0
- 1
- 2

**10. Was the distal bile duct resection-margin tumor free?**

- Yes
- No

**11. Was mTor inhibitor part of immunosuppression in maintenance?**

- No
- Yes
- Unknown

**12. Has there been evidence for recurrence of hilar CCA after liver transplantation?**

- No
- Yes, please specify the date of recurrence of hilar CCA (format DD.MM.YYYY)

**13. What was the last date of follow-up?**

DD MM YYYY

Please fill in the last  /  /   
date of follow-up

**14. What was the status at last follow-up?**

- Alive
- Dead, please specify date of death (format DD.MM.YYYY)

Thank you for completing this survey!

Participating centers are welcomed as co-author according to the regulations for ELTR-based studies and publications.
