# Supplementary material for: Strict Selection Alone of Patients Undergoing Liver Transplantation for Hilar Cholangiocarcinoma Is Associated with Improved Survival
Source: PubMed Central journal article supplement (PMC4898828; doi:10.1371/journal.pone.0156127), 2016-06-08
Supplement: pone.0156127.s002.pdf [file pone.0156127.s002.pdf]

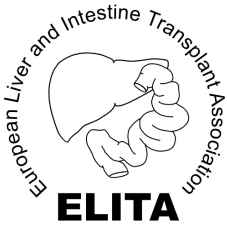

**European Liver and Intestine Transplant Association**  
A Section of the European Society for Organ Transplantation

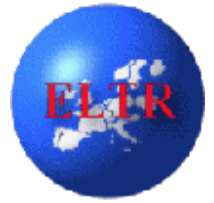

**and the European Liver Transplant Registry (ELTR)**

**Chairman**

Andrew K. Burroughs

•  
**Vice Chairman**

Bernard de Hemptinne

•  
**Secretary**

Paolo Muiesan

•  
**Treasurer**

Michele Colledan

•  
**ELTR Custodian**

Rene Adam

•  
**Members**

William Bennet  
Gabriela A. Berlakovich  
Christophe Duvoux  
Martin Oliverius  
Jacques Pirenne  
Johann Pratschke

**Prof. Robert Porte**

Head of Hepato-Pancreato-Biliary Surgery and Liver Transplantation  
University Medical Center Groningen  
P.O. Box 30.001  
9700 RB Groningen  
The Netherlands

Subject: ELTR Study Proposal

Monday 20<sup>th</sup> June, 2011

Dear Robert,

With reference to your e-mail dated 2<sup>nd</sup> January 2011 proposing a study based on ELTR database on the outcome after liver transplantation for cholangiocarcinoma (CCA) we are very pleased to send official confirmation that we accept this interesting project and that you may therefore make use of the ELTR data.

Best Regards,

Paolo Muiesan  
ELITA Secretary

Andrew K. Burroughs  
ELITA Chairman

René Adam  
ELTR Custodian
