# Supplementary material for: Strict Selection Alone of Patients Undergoing Liver Transplantation for Hilar Cholangiocarcinoma Is Associated with Improved Survival
Source: PubMed Central journal article supplement (PMC4898828; doi:10.1371/journal.pone.0156127), 2016-06-08
Supplement: pone.0156127.s003.pdf [file pone.0156127.s003.pdf]

## University Medical Center Groningen

### Medical Ethics Review Board

Phone +31(0)50 361 42 04

Fax +31 (0)50 361 43 51

E-mail metc@umcg.nl

Ref. M16.191012

To  
Henk-Jan Mantel, MD  
Hepatopancreaticobiliaire Chirurgie en  
Levertransplantatie  
**Huispostcode: BA 33**

Date: 11<sup>th</sup> April 2016

Subject: **Strict Selection Alone of Patients Undergoing Liver Transplantation for Hilar Cholangiocarcinoma is Associated with Improved Survival**

Dear Sir,

I, the undersigned, declare that the submission entitled "***Strict Selection Alone of Patients Undergoing Liver Transplantation for Hilar Cholangiocarcinoma is Associated with Improved Survival***" by Mantel et al, fulfils all the requirements for patient anonymity and is in agreement with regulations of our University Hospital for publication of patient data.

Sincerely,

*p/o*  
  
W.A. Kamps MD PhD  
chairman

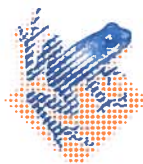

**umcg**
